# Supplementary material for: Myosin VI small insert isoform maintains exocytosis by tethering secretory granules to the cortical actin
Source: PubMed Central journal article supplement — J Cell Biol. 2013 Feb 4;200(3):301–20. doi: 10.1083/jcb.201204092 (PMC3563687; doi:10.1083/jcb.201204092), 2013-02-04
Supplement: supp_jcb.201204092_JCB_201204092_sm.pdf [file supp_jcb.201204092_JCB_201204092_sm.pdf]

Tomatis et al., <http://www.jcb.org/cgi/content/full/jcb.201204092/DC1>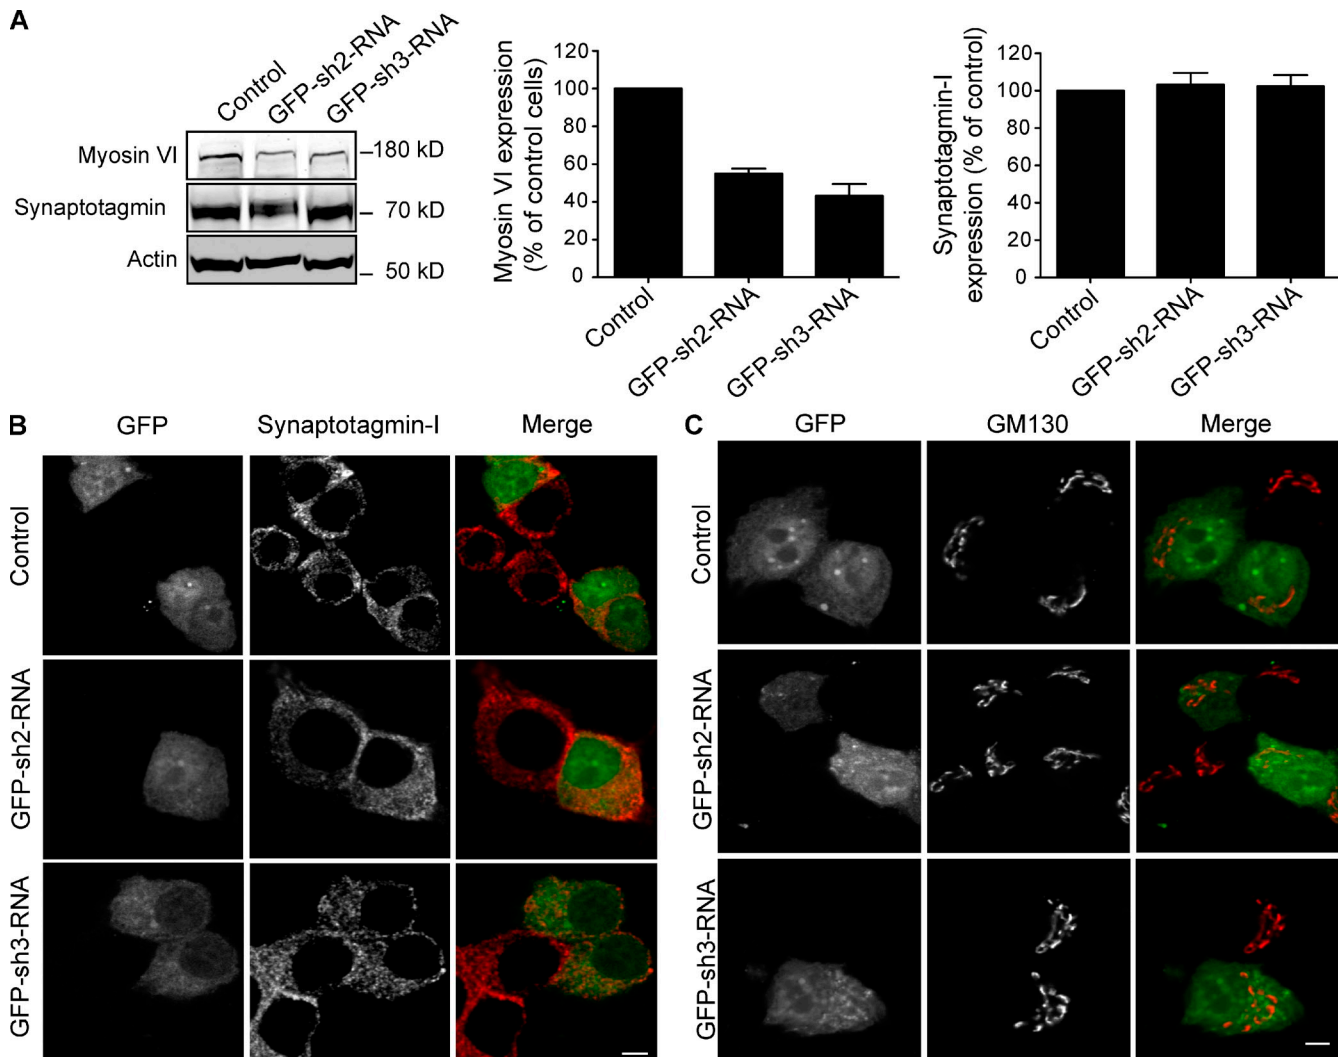

Figure S1. **Myosin VI knockdown does not affect SG biogenesis or Golgi organization.** (A, top) Analysis of Synaptotagmin-I expression levels by Western blotting using an anti-Synaptotagmin-I antibody in cells transfected with GFP-scrambled shRNA (control) or with GFP-shRNA against myosin VI (GFP-sh2-RNA and GFP-sh3-RNA).  $\beta$ -Actin was blotted as a loading control ( $n = 4$ ). Error bars are means  $\pm$  SEM. (B and C) Cells transfected with GFP-scrambled shRNA (control) or with GFP-shRNA against myosin VI were fixed and immunostained with anti-Synaptotagmin-I (red; B) or anti-GM130 (C) antibodies and imaged by confocal microscopy. Bars, 5  $\mu$ m.

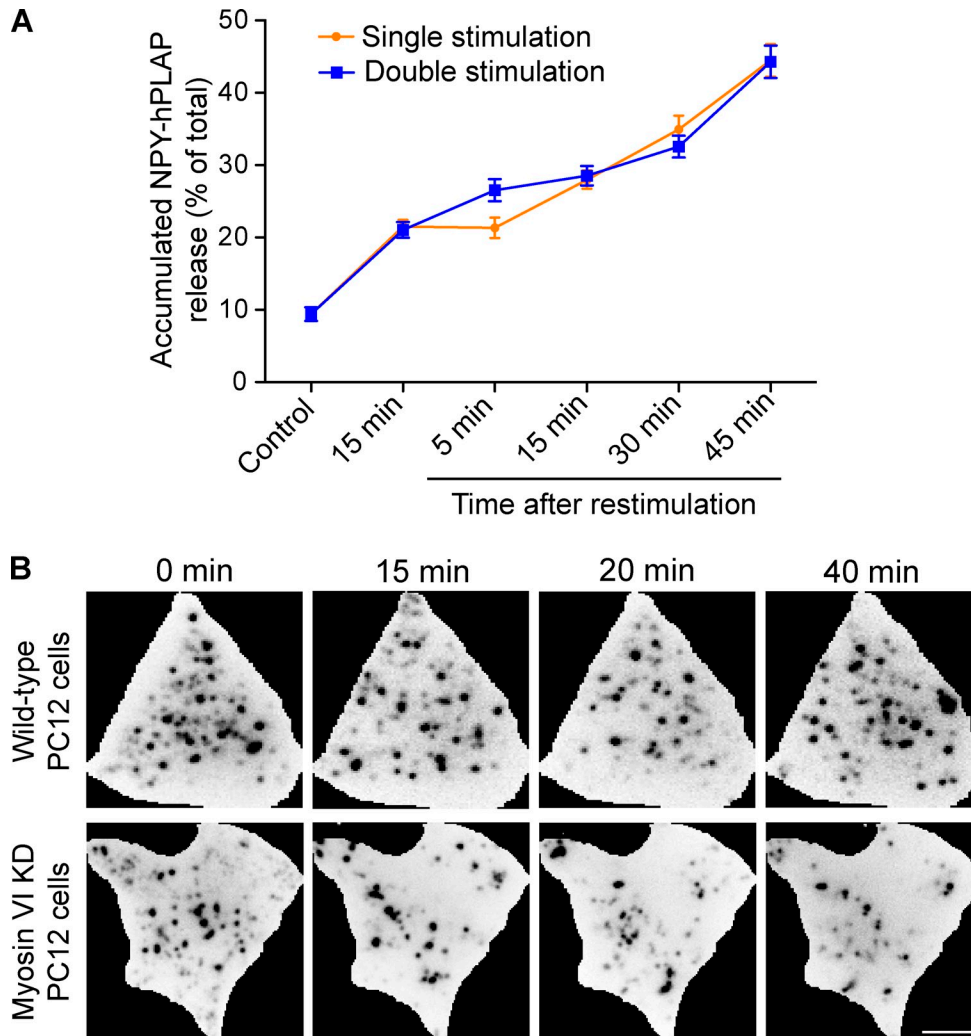

Figure S2. **Myosin VI knockdown affects SG replenishment after stimulation.** (A) Comparison of NPY-hPLAP release in control PC12 cells in response to a long single prolonged stimulation or a double-stimulation protocol. Curves were compared using two-way analysis of variance, revealing no significant difference ( $P = 0.6$ ). Error bars are means  $\pm$  SEM. (B) Wild-type or myosin VI knockdown (KD) PC12 cells expressing NPY-mCherry were imaged at 1 frame/2 s for 40 min by TIRF microscopy after a single high  $K^+$  stimulation. Images are representative of the SG density at each time point. Bar, 5  $\mu$ m.

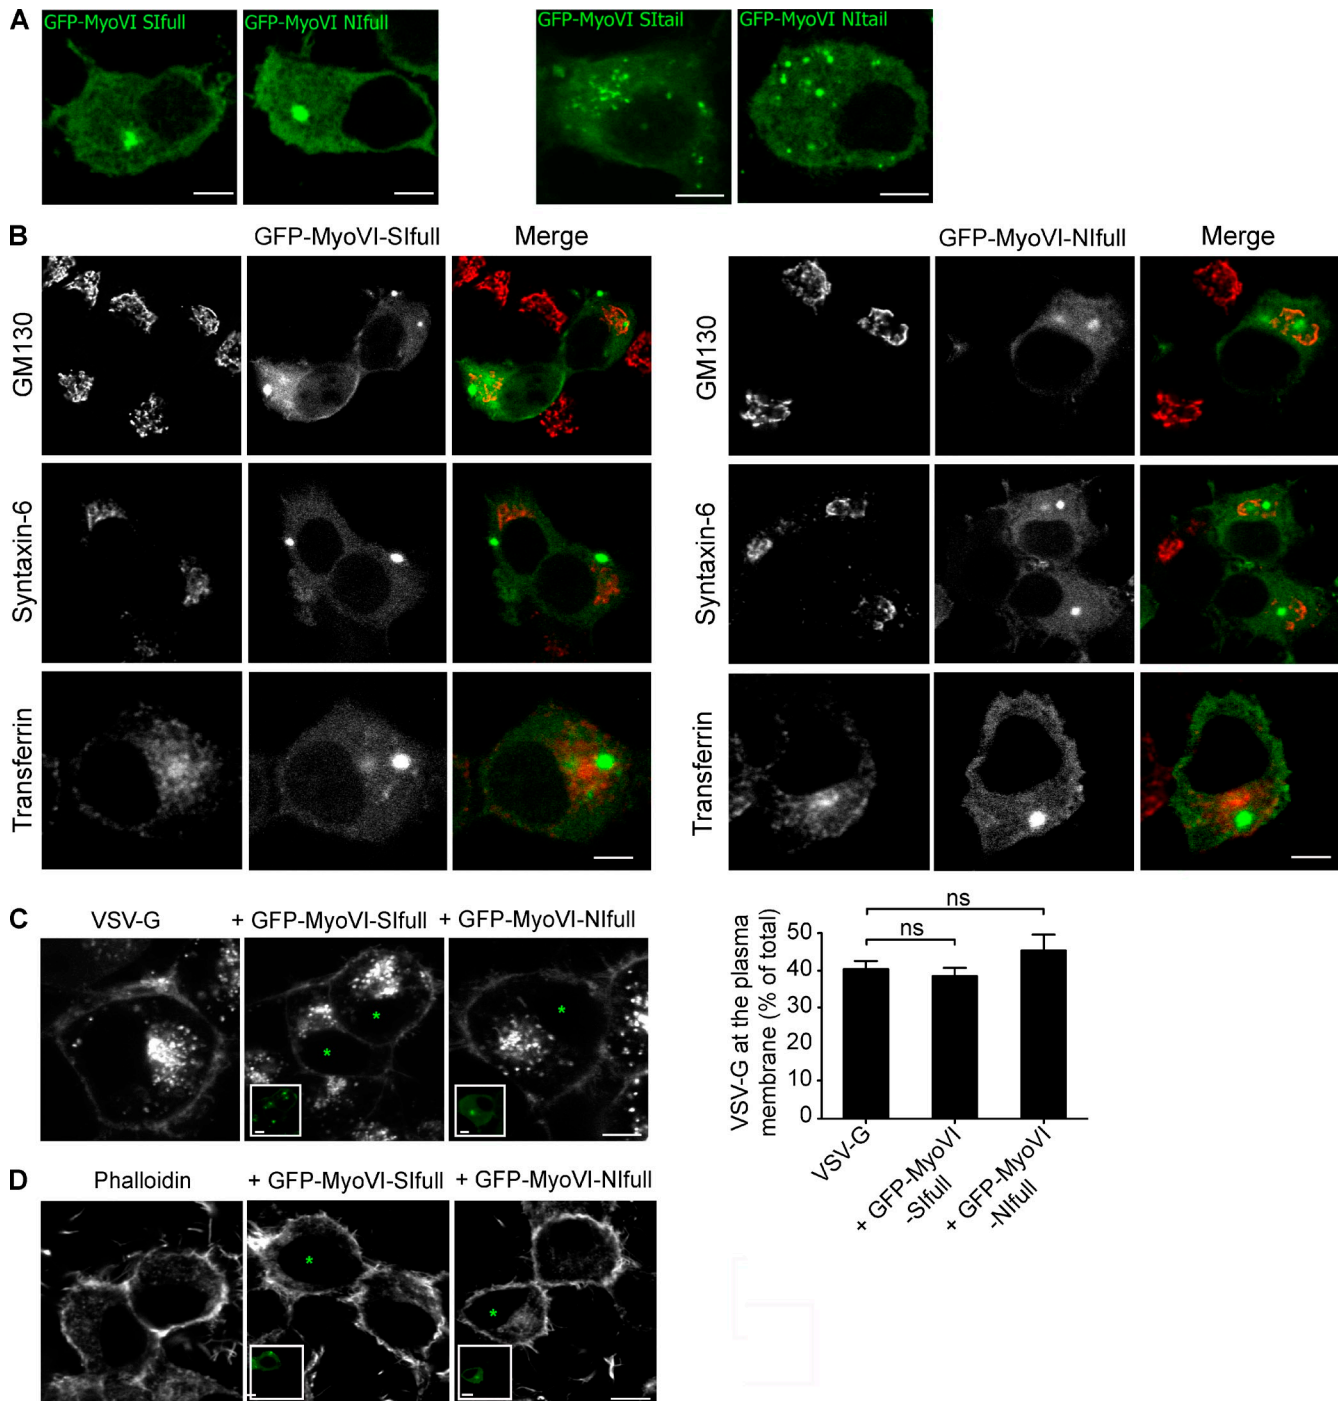

**Figure S3. GFP-MyoVI-full expression does not affect endocytic or exocytic pathways.** (A) Cells expressing the GFP-MyoVI proteins were fixed and imaged by confocal microscopy after a 48 h transfection. (B) Cells expressing GFP-MyoVI-Sifull (left) or GFP-MyoVI-NIfull (right) were imaged by confocal microscopy after immunolabeling with anti-GM130 (top) or anti-syntaxin-6 (middle) antibodies or after transferrin uptake (bottom). (C) Cells expressing VSV-G alone or coexpressing it with GFP-MyoVI-Sifull or GFP-MyoVI-NIfull were imaged by live-cell confocal microscopy. The amount of VSV-G at the plasma membrane was quantified and expressed as a percentage of total VSV-G. Error bars are means  $\pm$  SEM. (D) Fixed control cells or cells expressing GFP-MyoVI-Sifull or GFP-MyoVI-NI were labeled with fluorescent phalloidin and imaged by confocal microscopy. (C and D) Green asterisks highlight transfected cells. Insets show the GFP channel. Bars, 5  $\mu$ m.

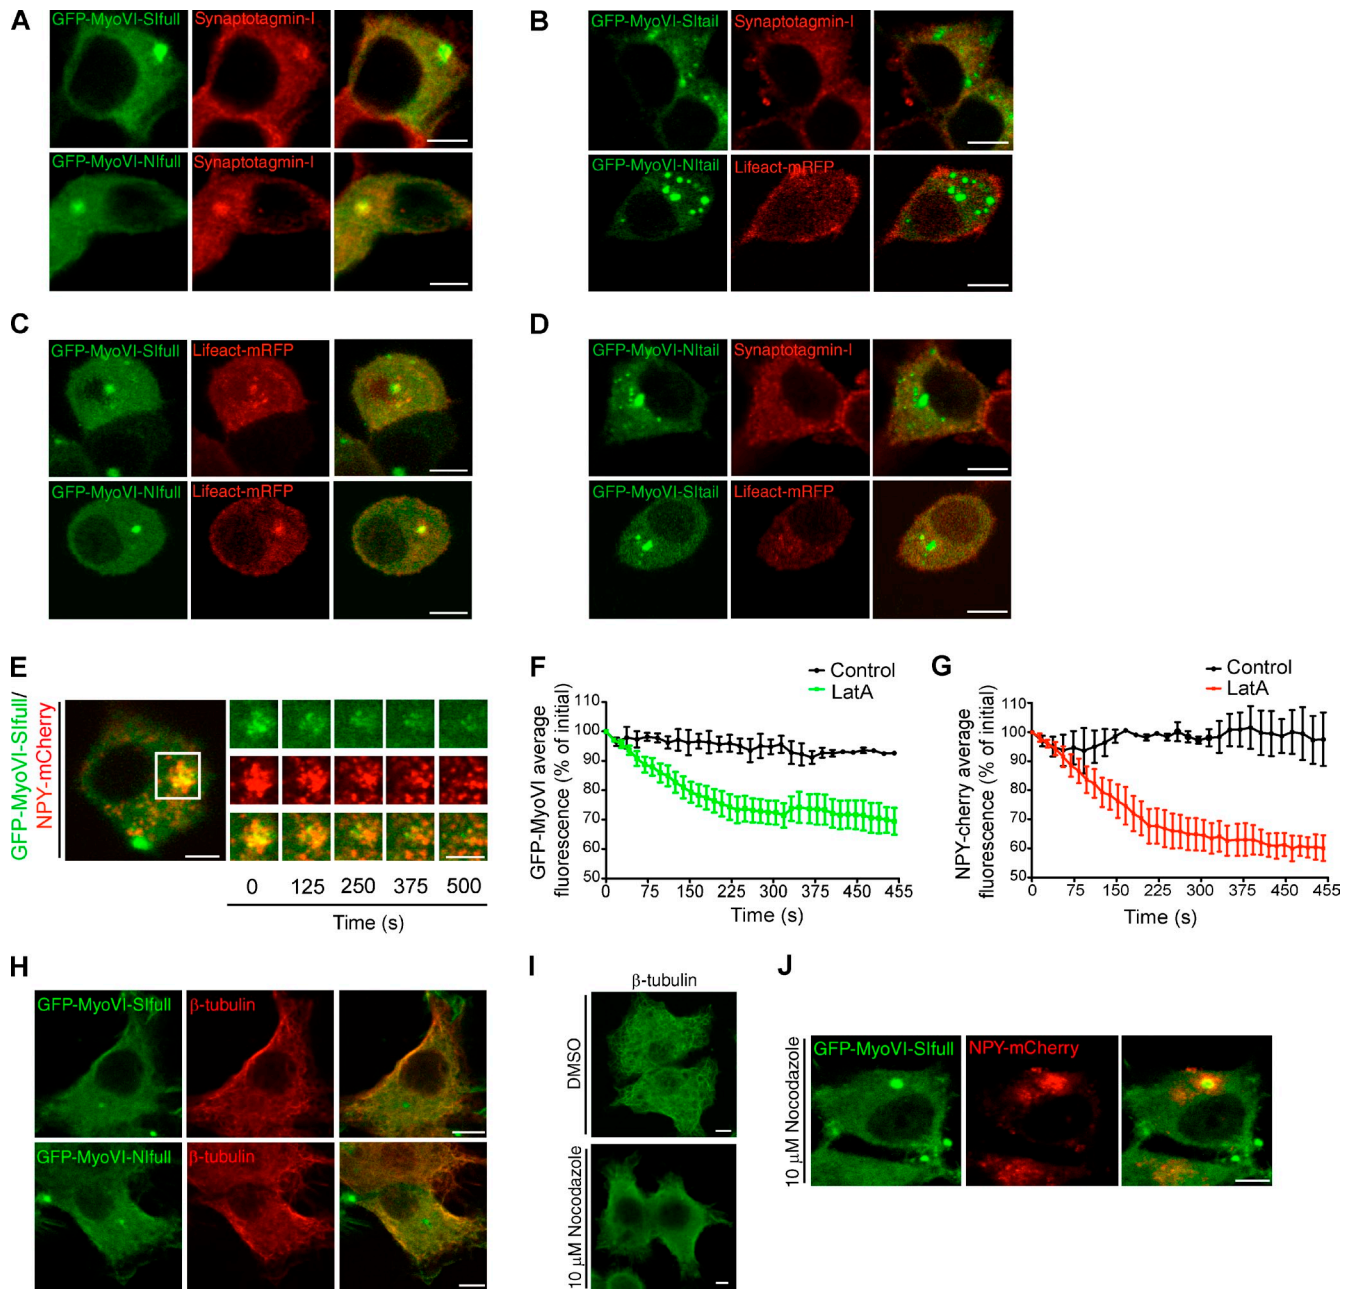

**Figure S4. GFP-MyoVI expression in PC12 cells reorganizes SGs in an F-actin-dependent, but not microtubule-dependent, manner.** (A and B) Cells expressing GFP-MyoVI-Sifull or GFP-MyoVI-Nifull (A) and GFP-MyoVI-Sifull or GFP-MyoVI-Nifull (B) were fixed and immunostained with the anti-Synaptotagmin-I antibody and imaged by confocal microscopy. (C and D) Cells coexpressing lifeact-mRFP with GFP-MyoVI-Sifull or GFP-MyoVI-Nifull (C) and lifeact-mRFP with GFP-MyoVI-Sifull or GFP-MyoVI-Nifull (D) were analyzed by live-cell confocal microscopy. (E) Cells coexpressing GFP-MyoVI-Sifull and NPY-mCherry were imaged using live-cell confocal microscopy after the addition of 6  $\mu$ M latrunculin A. Single plane images were taken every 5 s, and pinholes were adjusted to obtain a 2- $\mu$ m optical slice. Insets highlight the clustering of NPY-mCherry-positive SGs around the GFP-MyoVI-positive structures. (F and G) Quantification of the average fluorescence of GFP-MyoVI-Sifull structures (F) or NPY-mCherry clusters (G) in control cells (control) or latrunculin A-treated cells (LatA). Data represent means  $\pm$  SEM ( $n = 3$  experiments) and are expressed as a percentage of initial. (H) Cells expressing GFP-MyoVI-Sifull or GFP-MyoVI-Nifull were fixed and immunostained with anti- $\beta$ -tubulin antibody and imaged by confocal microscopy. (I) PC12 cells were treated for 20 min with 10  $\mu$ M nocodazole or vehicle (DMSO) at 37°C. After treatment, microtubule integrity was evaluated by immunostaining with anti- $\beta$ -tubulin antibody (green) and imaged by confocal microscopy. (J) Cells coexpressing GFP-MyoVI-Sifull and NPY-mCherry were treated with 10  $\mu$ M nocodazole for 20 min at 37°C, fixed, and imaged by confocal microscopy. Bars, 5  $\mu$ m.

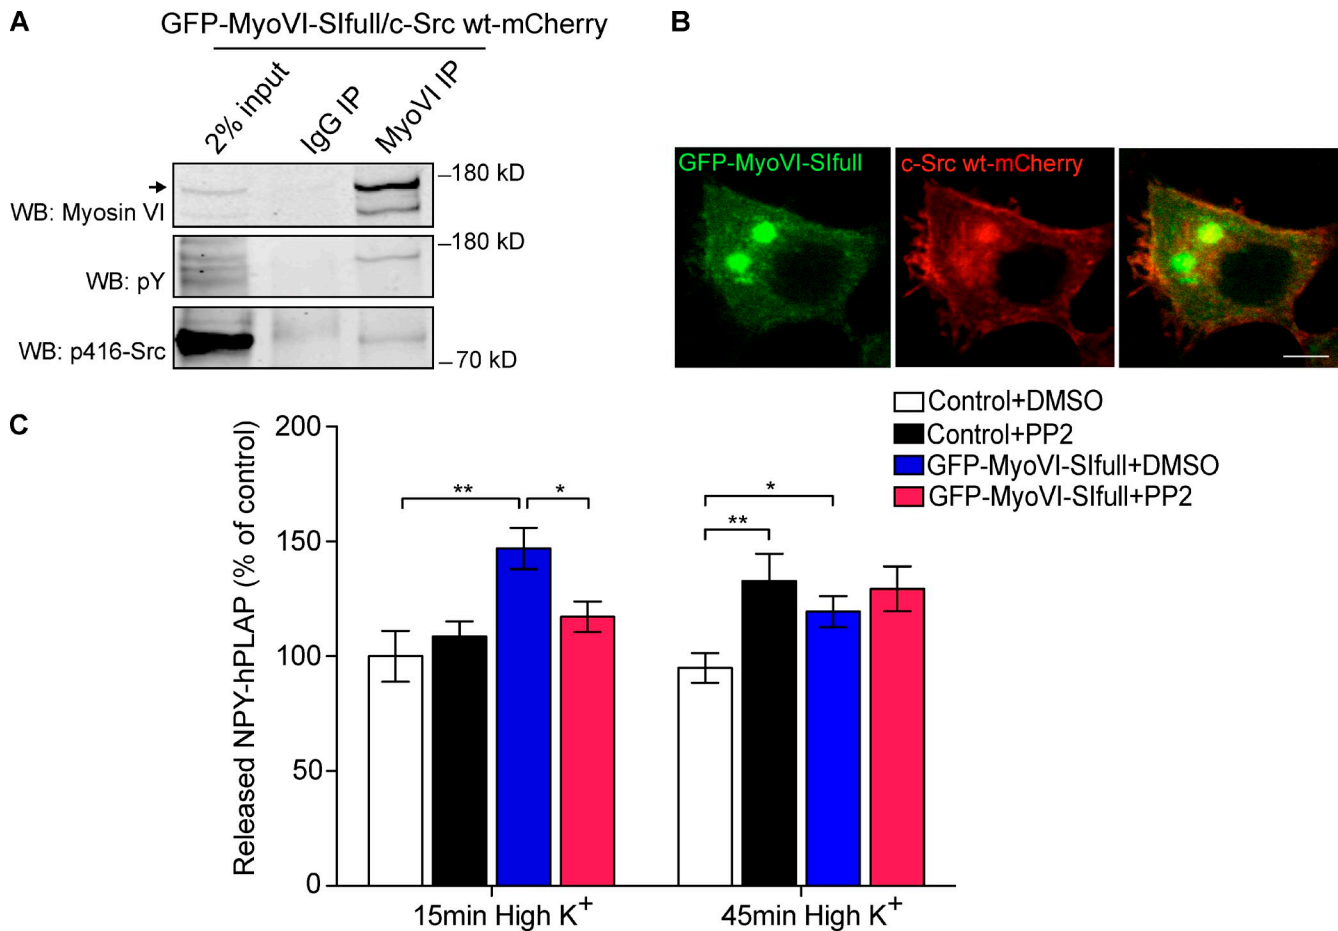

Figure S5. **The potentiation in SG-evoked release mediated by myosin VI SI is regulated by c-Src activity.** (A) Myosin VI immunoprecipitation (IP) from cells coexpressing GFP-MyoVI-Slfull with c-Src wild type (wt)-mCherry. (top) Western blotting (WB) against myosin VI. The arrow indicates the GFP-MyoVI-Slfull band. (middle) Phosphorylation of immunoprecipitated GFP-MyoVI-Slfull was evaluated by Western blotting using a general antiphosphotyrosine (pY) antibody. (bottom) c-Src wild type-mCherry expression was evaluated by Western blotting using a specific antiphosphorylated Src antibody (pY416-Src). (B) 72 h after transfection, PC12 cells coexpressing GFP-MyoVI-Slfull and c-Src wild type-mCherry were fixed and imaged by confocal microscopy. Bar, 5  $\mu$ m. (C) PC12 cells coexpressing NPY-hPLAP with GFP (control) or GFP-MyoVI-Slfull were treated with 20  $\mu$ M PP2 (PP2) or vehicle (DMSO) at 37°C for 15 min. After treatment, cells were incubated with PSS or PSS-high K<sup>+</sup> containing 20  $\mu$ M PP2 or DMSO for 15 min (first round of stimulation). Supernatants were collected, and cells were washed and reincubated for 45 min (second round of stimulation) with the respective buffer. Released NPY-hPLAP is expressed as percentage of NPY-hPLAP released in control + DMSO cells. Values are expressed as means  $\pm$  SEM of three independent experiments. \*, P < 0.05; \*\*, P < 0.01.

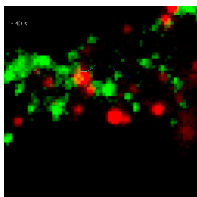

Video 1. **Myosin VI SI restricts the movement of SGs near the plasma membrane.** Myosin VI stable knockdown PC12 cells cotransfected with GFP-MyoVI-Slfull and NPY-mCherry were visualized after nicotine stimulation using time-lapse live-cell imaging using a TIRF microscope (Marianas and Everest; Intelligent Imaging Innovations, Inc.). The trajectory of a single NPY-mCherry-positive SG becomes restricted as its colocalization with GFP-MyoVI-Slfull increases. The video was compiled at two frames per second.

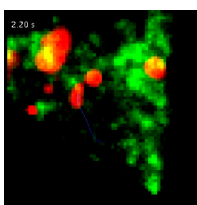

Video 2. **Myosin VI NI isoform lacks the ability to cage SG movement at the plasma membrane.** Myosin VI stable knockdown PC12 cells cotransfected with GFP-MyoVI-Slfull and NPY-mCherry were visualized after nicotine stimulation using time-lapse live-cell imaging using a TIRF microscope (Marianas and Everest; Intelligent Imaging Innovations, Inc.). The trajectory of a NPY-mCherry-positive SG is not restricted upon colocalization with GFP-MyoVI-Nlfull. The video was compiled at two frames per second.

Table S1. Selection of proteins identified by MALDI-TOF/TOF-MS

| Protein sequence accession number | Protein name                          | Species                        | Protein score     |                   |
|-----------------------------------|---------------------------------------|--------------------------------|-------------------|-------------------|
|                                   |                                       |                                | -Ca <sup>2+</sup> | +Ca <sup>2+</sup> |
| Q3MHM5                            | Tubulin $\beta$ -2C chain             | <i>Bos taurus</i> (bovine)     | 827               | 858               |
| Q3ZBU7                            | Tubulin $\beta$ -4 chain              | <i>B. taurus</i> (bovine)      | 748               | 754               |
| Q2T9S0                            | Tubulin $\beta$ -3 chain              | <i>B. taurus</i> (bovine)      | 430               | 502               |
| Q2HJ81                            | Tubulin $\beta$ -6 chain              | <i>B. taurus</i> (bovine)      | 398               | 412               |
| P81287                            | Annexin A5                            | <i>B. taurus</i> (bovine)      | 230               | 881               |
| P63026                            | Vesicle-associated membrane protein 2 | <i>B. taurus</i> (bovine)      | 63                | 81                |
| Q13748                            | Tubulin $\alpha$ -2 chain             | <i>Homo sapiens</i> (human)    | -                 | 800               |
| P04272                            | Annexin A2                            | <i>B. taurus</i> (bovine)      | -                 | 299               |
| Q9BUF5                            | Tubulin $\beta$ -6 chain              | <i>H. Sapiens</i> (human)      | -                 | 290               |
| Q99867                            | Tubulin $\beta$ -4q chain             | <i>H. Sapiens</i> (human)      | -                 | 163               |
| P46193                            | Annexin A1                            | <i>B. taurus</i> (bovine)      | -                 | 141               |
| P20072                            | Annexin A7                            | <i>B. taurus</i> (bovine)      | -                 | 107               |
| Q2KJDO                            | Tubulin $\beta$ -5 chain              | <i>B. taurus</i> (bovine)      | 904               | 1150              |
| Q9NY65                            | Tubulin $\alpha$ -8 chain             | <i>H. Sapiens</i> (human)      | 775               | 745               |
| Q3MHM5                            | Tubulin $\beta$ -2C chain             | <i>B. taurus</i> (bovine)      | 734               | 965               |
| Q6B856                            | Tubulin $\beta$ -2B chain             | <i>B. taurus</i> (bovine)      | 712               | 896               |
| Q3ZBU7                            | Tubulin $\beta$ -4 chain              | <i>B. taurus</i> (bovine)      | 647               | 866               |
| Q3T149                            | Heat shock protein $\beta$ -1         | <i>B. taurus</i> (bovine)      | 522               | 577               |
| Q27975                            | Heat shock 70-kD protein 1A           | <i>B. taurus</i> (bovine)      | 343               | 220               |
| Q9BUF5                            | Tubulin $\beta$ -6 chain              | <i>H. Sapiens</i> (human)      | 256               | 370               |
| P34933                            | Heat shock-related 70-kD protein 2    | <i>B. taurus</i> (bovine)      | 235               | 171               |
| P55063                            | Heat shock 70-kD protein 1L           | <i>Rattus norvegicus</i> (rat) | -                 | 185               |
| Q99867                            | Tubulin $\beta$ -4q chain             | <i>H. Sapiens</i> (human)      | 189               | 191               |
| P48616                            | Vimentin                              | <i>B. taurus</i> (bovine)      | 110               | 84                |
| Q2HJ81                            | Tubulin $\beta$ -6 chain              | <i>B. taurus</i> (bovine)      | -                 | 478               |
| Q61696                            | Heat shock 70-kD protein 1A           | <i>Mus musculus</i> (mouse)    | -                 | 322               |
| P13533                            | Myosin VI                             | <i>H. Sapiens</i> (human)      | -                 | 121               |

Peptide mass and fragmentation data were used to search against mammalian proteins in the SwissProt database using Mascot. Mascot protein scores >65 represent a >95% probability of a nonrandom match of peptide data. For Myosin VI, the human orthologous protein was found likely because of the absence of a bovine sequence entry for this protein in the database. Shown proteins were selected based on a previously identified role in vesicular trafficking or cytoskeletal function. Hyphens indicate no protein score.
